# Supplementary material for: SPL12 Regulates AGL6 and AGL21 to Modulate Nodulation and Root Regeneration under Osmotic Stress and Nitrate Sufficiency Conditions in Medicago sativa
Source: MDPI journal article supplement (doi:10.3390/plants11223071), 2022-11-13
Supplement: s1 [file s1]

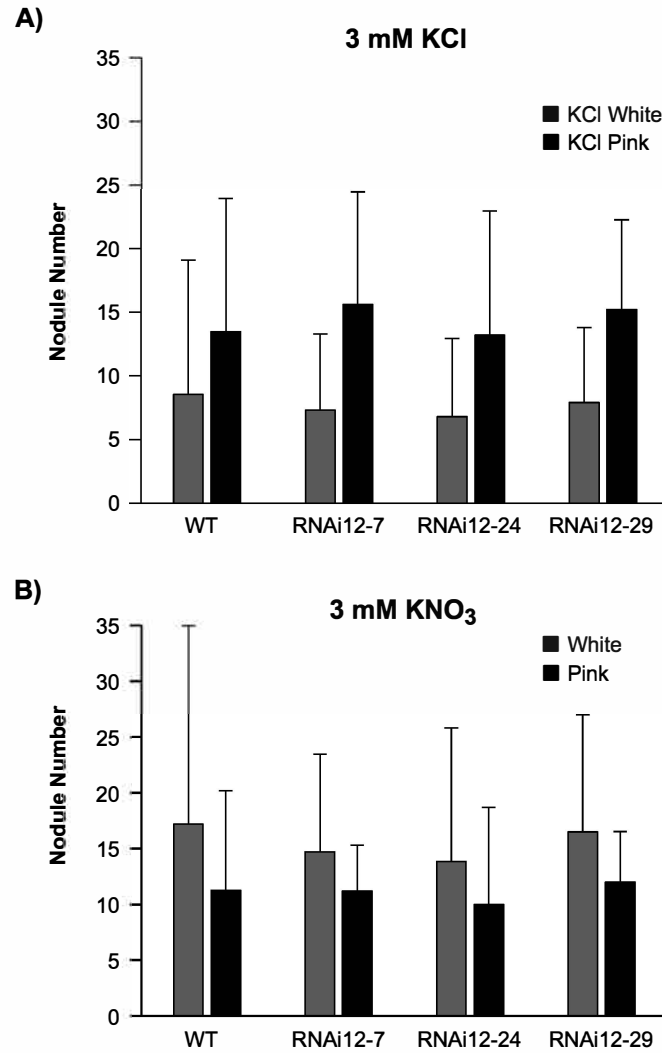

**Figure S1. Effect of nitrate on nodulation in *SPL12*-RNAi plants.**

The average numbers of pink and white nodules in WT and *SPL12*-RNAi at 21 dai (n = 15-22) under 3 mM (a) KCl and (b) KNO<sub>3</sub>. Error bars indicate standard deviation.

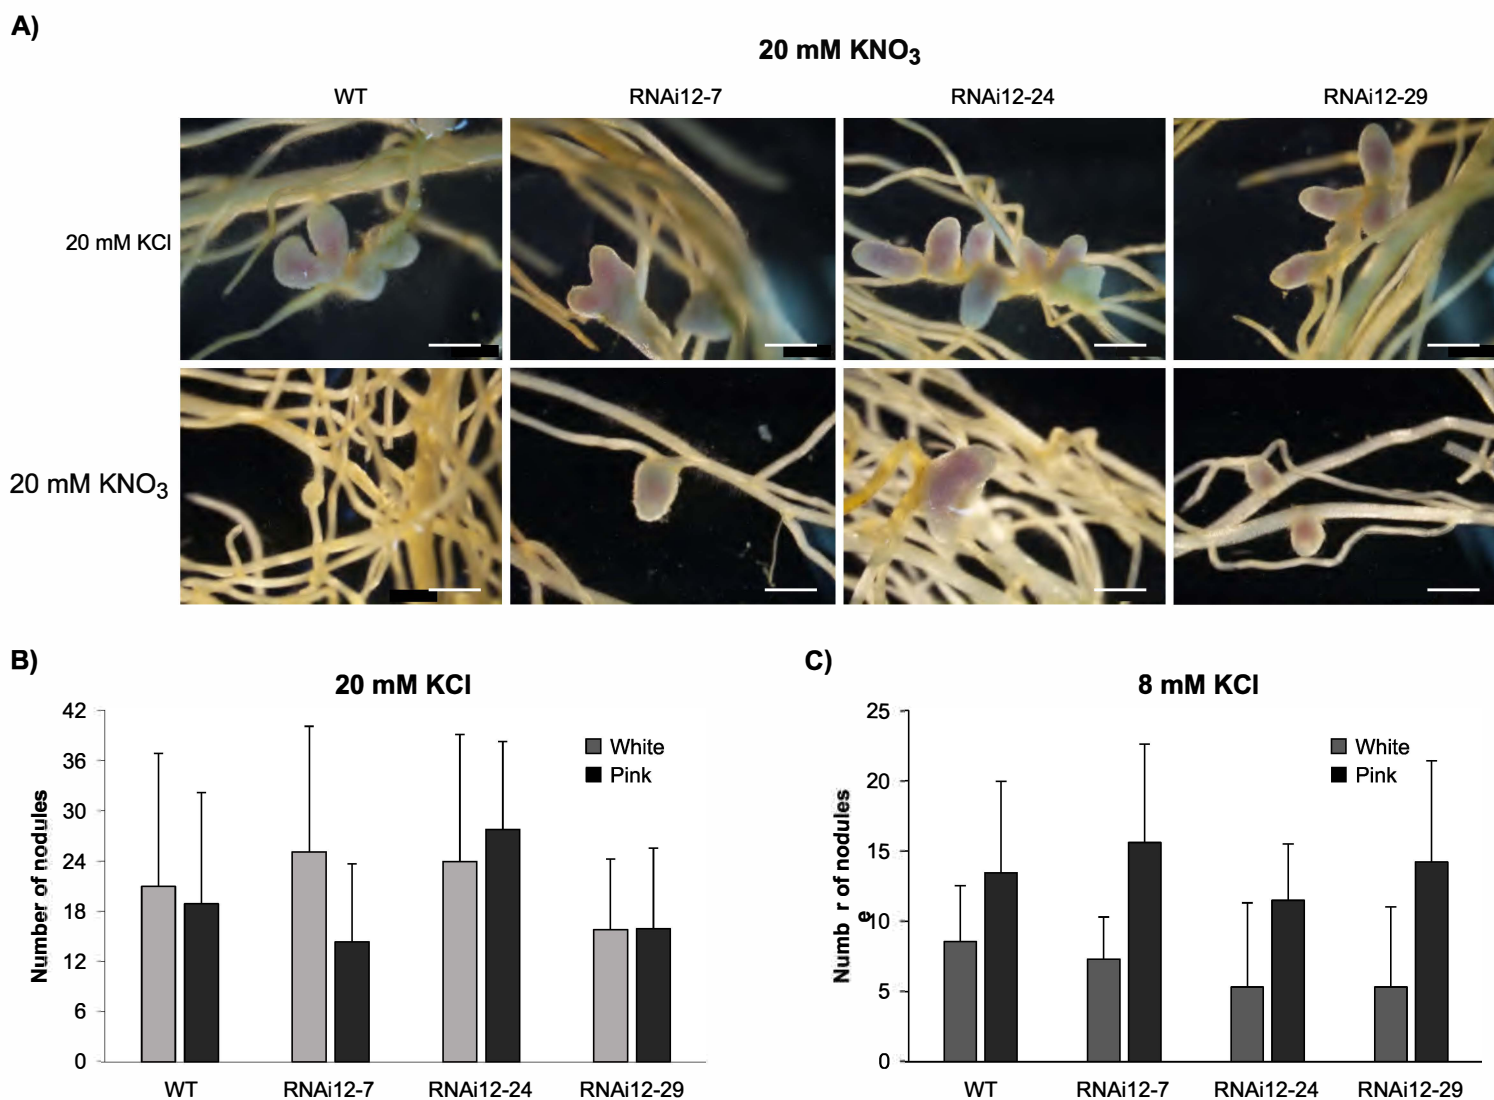

**Figure S2. Effect of nitrate on nodule phenotype in *SPL12*-RNAi plants.**

(A) Nodule phenotypes of WT and the *SPL12*-RNAi genotypes at 21 dai growing in nitrate-starved substrate and watered with 20 mM KCl or KNO<sub>3</sub>. Scale bars: 1 mm. The average numbers of pink and white nodules in WT and the *SPL12*-RNAi at 21 dai under (B) 20 mM KCl (n = 14-25 plants) and (C) 8 mM KCl (n = 15-22). Error bar indicates standard deviation.

GGAGGTTACAACATATATACTAATAGGACTAATACTACTTGTAACATAAATATGTATCTCTAATAGGTGTTTTGATGTGCGAGGTGTAAGGTT  
TTCTTTTGGTGTTCGCGATATATACGACGTCTTTTGTATGTTGTTTATTCTTACCGGTCTCTAAAACATTACTCTTTAAAAAATATGAAAGAT  
TTTTCAATTTCTCTATATTTCTCACCCCTAATGTGTTACCTAAACCTCTAAGATTCTAAAACATGAACTTTTCTTTTGGAGATACCCTTTT  
TAGAACGGGTGATTATGCCTCCTGAATTTGTATCAGCAGGAGTGACAACATCACTTTGCTTCTTTTTTTCTGCAGTTCCATGTTAACCTTT  
GTTAGAGTTTCCACATGTTTGTGGGATTGTATTCTGCACAATTAAGTGTTTGCCTCAGGATCATCCTCTGCTAAGTCACCCCAATGTTCC  
TTAAGGATGTACACTCCTCTTACTAGCCTCTGTGGGTACACTCCTCTTACAAGCCTCATCAAATTTAACAAAGTTTTTTCTTCTCAAACAA  
AAAACTCTTATCCCTTTAAGCTTCTAGCTCCACTCACCCATTTTCGAATGTAGATCTCTTCTACTCGGATATTGCCAACAACTAAGGAA  
AACTTGCTTAAGAGAGTAGACATCAATACATCTATCATGTCAAATGAATTCTCCCTTCATCTTCATTTTTTACACGCTAAGCTCGTAAAT  
TGATCCCTTTAACCCTTACATACGGTCTAAACAACACAAATTGTTCCATCACAAAGGAAGTTGATGACTCTGGAGAAGCCAAAGTGCTA  
ACACCATACTTGGTTGACAAGACGTTTATCCATTGAGACTACCTTTATTAATAACTGCCACCTCCATTGGTTGAAATATATTGTCTACACATG  
TCCCCTAATGAATAAAGTATCAGTACGCACGCTCCCAGAAAGCGTGCGAGTGAGGACAAAACACGCTGAAAAGATTTGCGTTGATTTGTG  
GGTCAGTCGGCAATCCTAAAAGCAGTCTGAGATGTTACATTGGGAGCCCTTCTGGAGGGCACCTAAGCCTCTCTAGAAGGCATTTGTTT  
CCTTAGGAATAGATTGACGATTCAATTATATTATTAAGTTTGTGTAATAATGACCAAAATGGTTTATGAGAAGTACGCTCTTGTCAAAAATAC  
TTTTTTAAGAGGCTAGACGTGTTATCGTCATGCCTTATATTGATAAGGCTTTTAATTTTATATTCTTTTAGAATGGCAAATGTTATTAATGAA  
TTGTTAGAATAATTTCTCTCCTTTATCCGAGTTTAAACTCAGGAACCTCAACTCCTTTATCTCTTGGCTCAAACCAGTTGAGTCATCCAACCTC  
CATAGATTAAGCATTTTATGATCAATGATATTGATAATTTTGGGAACAAATTAATAATATGATTATTCTTTCTTGTGGTCAGCATGAATCAGT  
GATTGAGAGATATAACATTTGCAAGGAAGACCAACAAGGGACAAATCCAGAATCTGAAGTCAAG

**Figure S3. Promoter sequence of the alfalfa *AGL21* gene with putative SBD binding elements.** Nucleotides highlighted with green/yellow represent putative SPL binding elements with ‘GTAC’ core sequences, those highlighted in blue represent forward and reverse primer sequences used for ChIP-qPCR. The red text shows coding sequences of *AGL21*.

**Table S1: List of primers used in this study**

| Primer name      | Primer Seq               |
|------------------|--------------------------|
| LA-MsSPL12-F1    | CCCCCAAACCAAAGATTTTA     |
| LA-MsSPL12-R1    | TCTTGGTTCCTTTGCCTTTG     |
| qMsAGL6-1F       | TGTTATGTGATGCTGAGGTTGC   |
| qMsAGL6-1R       | GTTCTCCTAAGTCACCATTCAG   |
| AGL21-F          | GGGAGGCAGAAATTTTAAGG     |
| AGL21-R          | TGGAGGCTAAGTTCCAGTTGA    |
| $\beta$ -actin-F | CAAAAGATGGCAGATGCTGAGGAT |
| $\beta$ -actin-R | CATGACACCAGTATGACGAGGTCG |
| ADF1qF           | TCAAGGCGAAAAGGACACAC     |
| ADF1qR           | AAAACAGCATAGCGGCACTC     |
| CycloqF          | CAAACCTTTCCTGACGAGTCACC  |
| CycloqR          | ACGGTCAGCAATTGCCATTG     |
| qMsLOBF          | AGATGGTGATTTCGTGACCCG    |
| qMsLOBR          | CTGTTGCTGCTGTTGTTGATTC   |
| LysM-F           | TTGGAGTCGTGCTGTTGGAA     |
| LysM-R           | AGCTTTCGATGAGGCAAGGA     |
| CLE13-F          | TCCTCACACCAAGAGTTTATGCT  |
| CLE13-R          | TCCTGTAGGCACTTTGCGTT     |
| SULTR3.4-F       | TGGAAATTCACAGGGTTCGT     |
| SULTR3.4-R       | CTCAGGACCCCATTGAAAAA     |
| SULTR3.5-F       | GCACTTTTCCCTGATGATCC     |
| SULTR3.5-R       | TGGCAAGACTAGCAATGGTG     |
| q1MsAGL21-F      | AAGTGTTTGCGTCAGGATCA     |
| q1MsAGL21-R      | CGAAAAATGGGTGAGTGGAG     |
| q2MsAGL21-F      | CCACCTCCATTTGGTTGAAA     |
| q2MsAGL21-R      | TCAGCGTGTTTTGTCCTCAC     |
| q3MsAGL21-F      | CCTCTCTAGAAGGCATTTGTTC   |
| q3MsAGL621-R     | AAGGCATGACGATAACACGTC    |
| GSH-F            | ACGCTTCCCAGCTTTAATGA     |
| GSH-R            | CCCCAACAAGAAGACCATTG     |
| WD40-1-F         | GGATGAATCTGTGAACGCCG     |
| WD40-1-R         | CTTTGTCCACGGCTCAAACA     |
